# Supplementary material
Source: PubMed Central journal article supplement (PMC3820921)
Supplement: supp_O113.029777_mcp.O113.029777-4.pdf [file supp_O113.029777_mcp.O113.029777-4.pdf]

## Supplementary images

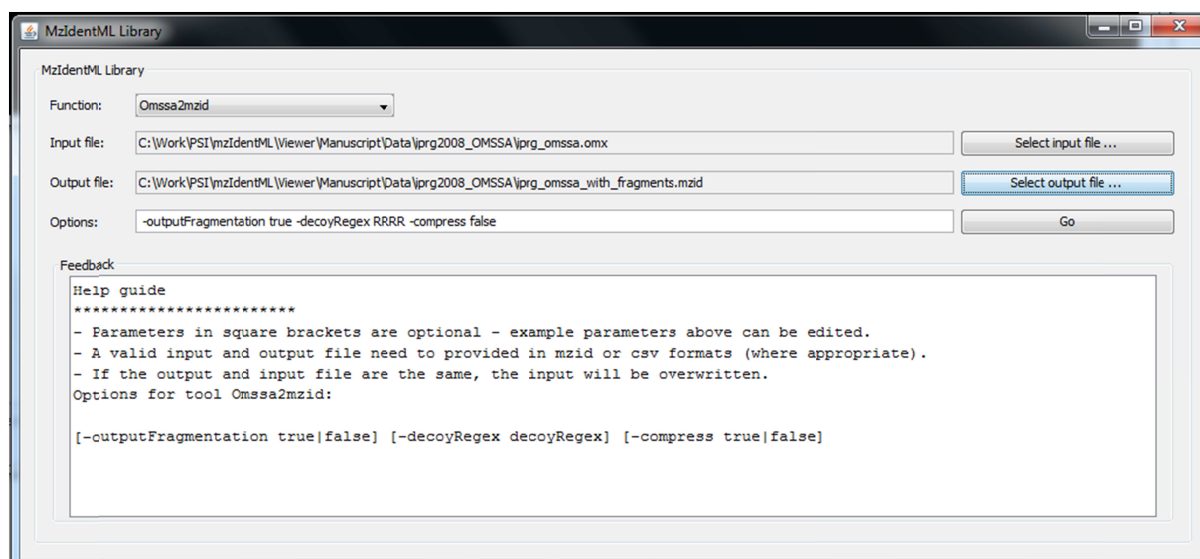

**S. Figure 1.** A screenshot of the basic graphical interface for calling the mzidLibrary.

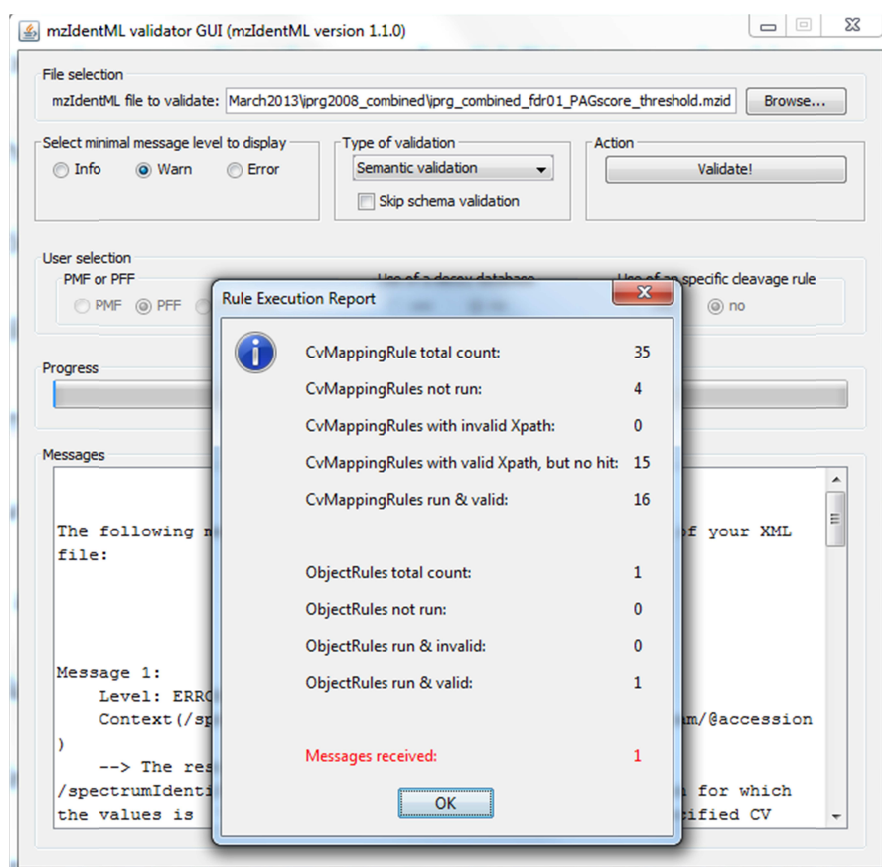

**S. Figure 2.** A screenshot of the mzidValidator showing the summary output and the detailed output behind with validation errors and pointers to the positions in the file causing errors.
